# Supplementary material for: Adsorptive removal of bulky dye molecules from water with mesoporous polyaniline-derived carbon
Source: publisher site journal article supplement (doi:10.3762/bjnano.11.47), 2020-04-08
Supplement: Additional file 1 [file 2190-4286-11-47-S1.pdf]

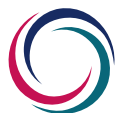

## Supporting Information

for

### **Adsorptive removal of bulky dye molecules from water with mesoporous polyaniline-derived carbon**

Hyung Jun An, Jong Min Park, Nazmul Abedin Khan and Sung Hwa Jung

*Beilstein J. Nanotechnol.* **2020**, *11*, 597–605. [doi:10.3762/bjnano.11.47](https://doi.org/10.3762/bjnano.11.47)

### **Additional experimental procedure “Adsorption of dyes from water” and additional experimental results**

## Adsorption of dyes from water

Firstly, the dye solutions with the concentration of 100 mg/L of each dye including AR1 and JGB were prepared via dissolving in deionized water (with 10% of methanol) and pH of the solutions was adjusted to 7 (considering the general pH of river water and rainwater [1]) by adding 0.1 M NaOH for batch adsorption experiments under a fixed adsorbates concentration (100 mg/L). Before adsorption, adsorbents (PDCs and activated carbon) were activated via drying for overnight at 100 °C by a vacuum pump. Dried adsorbent (3.0 mg) was added to 25 mL of aqueous solution of studied dyes and shaken using a Lab companion incubated shaker for a set time at a constant speed (250 rpm) and temperature (25 °C). The residual amount of the dyes in the separated (by filtration with a syringe filter made of hydrophobic polytetrafluoroethylene, 0.5 µm) solutions was estimated from the UV absorbance (UV-1800, Shimadzu, Japan) at wavelengths of 531, 618, 464 and 665 nm for AR1, JGB, MO, and MB, respectively. Adsorption experiments were generally performed three times, and the average values were reported in this work. The Langmuir isotherm [2] (equation is shown below) was adopted to investigate the adsorption capacity. Or, the maximum capacity of adsorption ( $Q_0$ ) was calculated based on the Langmuir adsorption isotherm after adsorption for 12 h under various conditions. The adsorption isotherms for different adsorbents were plotted according to the Langmuir equation [2].

$$\frac{C_e}{q_e} = \frac{C_e}{Q_0} + \frac{1}{Q_0 b},$$

where

$C_e$  is the equilibrium concentration of the adsorbate (mg/L)

$q_e$  is the amount adsorbed at equilibrium (mg/g)

$Q_0$  is the Langmuir constant (maximum adsorption capacity, mg/g)

$b$  is the Langmuir constant (L/mg).

Therefore, the maximum adsorption capacity,  $Q_0$ , can be obtained from the reciprocal of the slope of a plot of  $C_e/q_e$  against  $C_e$ .

Moreover, the adsorbed quantities of AR1 or JGB (from 100 mg/L solution) over the KOH-900 were also measured at a wide range of pH (2-12) after adjusting the pH with aqueous HCl (0.10 M) or NaOH (0.10 M) solution.

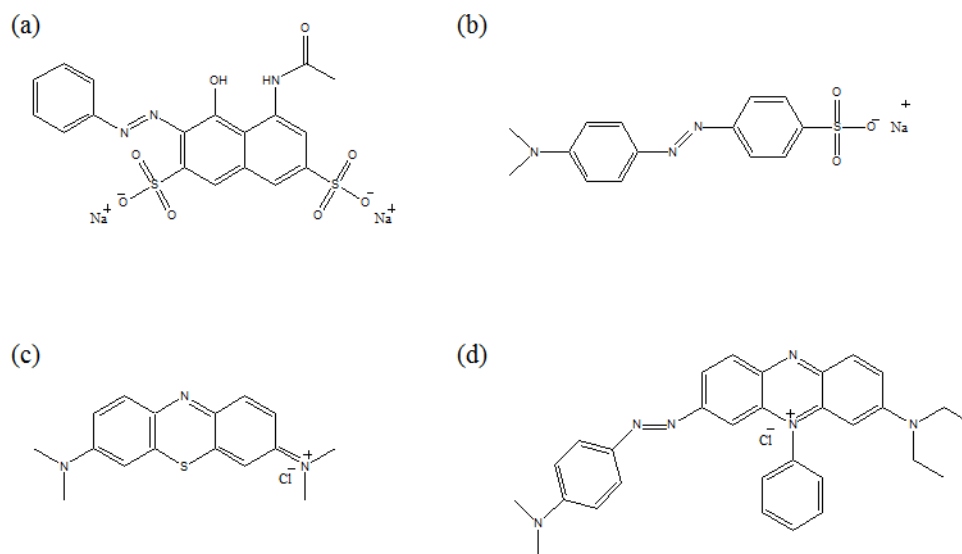

**Scheme S1:** Chemical structure of (a) acid red 1, (b) methyl orange, (c) methylene blue and (d) Janus green B.

**Table S1:** Textural properties of adsorbents.

---

| Material | $S_{\text{ABET}}$<br>( $\text{m}^2/\text{g}$ ) | $PV_{\text{total}}$<br>( $\text{cm}^3/\text{g}$ ) | $PV_{\text{micro}}$<br>( $\text{cm}^3/\text{g}$ ) | $PV_{\text{meso}}$<br>( $\text{cm}^3/\text{g}$ ) |
|----------|------------------------------------------------|---------------------------------------------------|---------------------------------------------------|--------------------------------------------------|
| AC       | 1020                                           | 0.56                                              | 0.29                                              | 0.27                                             |
| KOH-600  | 600                                            | 0.40                                              | 0.24                                              | 0.26                                             |
| KOH-700  | 2260                                           | 1.17                                              | 0.97                                              | 0.20                                             |
| KOH-750  | 2490                                           | 1.31                                              | 1.00                                              | 0.31                                             |
| KOH-800  | 2723                                           | 1.47                                              | 0.15                                              | 1.32                                             |
| KOH-900  | 2550                                           | 1.51                                              | 0.06                                              | 1.45                                             |

---

**Table S2:** The relative performances of KOH-900 and AC for adsorption of dyes after 6 h of adsorption.

| Adsorbates | Ratio of $q_{6h}$<br>(KOH-900/AC), mg/mg |
|------------|------------------------------------------|
| AR1        | 6.8                                      |
| MO         | 2.9                                      |
| MB         | 2.0                                      |
| JGB        | 11.5                                     |

**Table S3:** Maximum adsorption capacities ( $Q_0$ ) of some reported adsorbents for the adsorption of MO from water.

| Adsorbents                                          | S <sub>ABET</sub><br>(m <sup>2</sup> ·g <sup>-1</sup> ) | Solution pH | $Q_0$<br>(mg·g <sup>-1</sup> ) | Reference |
|-----------------------------------------------------|---------------------------------------------------------|-------------|--------------------------------|-----------|
| Mesoporous TiO <sub>2</sub>                         | 161                                                     | -           | 455                            | [3]       |
| Volcanic mud                                        | 46                                                      | -           | 333                            | [4]       |
| Phragmites australis activated carbon               | 1362                                                    | -           | 238                            | [5]       |
| Activated carbon derived from finger citron residue | 2887                                                    | 7.0         | 935                            | [6]       |
| PED-MIL-101                                         | 3296                                                    | 5.6         | 194                            | [7]       |
| MOF-235                                             | -                                                       | 5.6         | 477                            | [8]       |
| Commercial activated carbon                         | 1016                                                    | 7.0         | 224*                           | This work |
| KOH-900                                             | 2549                                                    | 7.0         | 652*                           | This work |

\*  $q_{6h}$

**Table S4:** Maximum adsorption capacities ( $Q_0$ ) of some reported adsorbents for the adsorption of MB from water.

| Adsorbents                              | $S_{ABET}$<br>( $m^2 \cdot g^{-1}$ ) | Solution<br>pH | $Q_0$<br>( $mg \cdot g^{-1}$ ) | Reference |
|-----------------------------------------|--------------------------------------|----------------|--------------------------------|-----------|
| AC                                      | -                                    | -              | 400                            | [9]       |
| Graphene oxide                          | 32                                   | 6.0            | 244                            | [10]      |
| SBA-15                                  | 669                                  | -              | 280                            | [11]      |
| Montmorillonite Clay (MC)               | 62                                   | 6.0            | 289                            | [12]      |
| Poly(methacrylic acid) modified biomass | -                                    | 6.5            | 870                            | [13]      |
| Papaya seeds                            | -                                    | -              | 556                            | [14]      |
| 3D HPC                                  | 3131                                 | -              | 574                            | [15]      |
| MOF-235                                 | -                                    | 5.6            | 187                            | [8]       |
| NH <sub>2</sub> -MIL-101(Al)            | 1980                                 | -              | 762                            | [16]      |
| Commercial activated carbon             | 1016                                 | 7.0            | 390*                           | This work |
| KOH-900                                 | 2549                                 | 7.0            | 795*                           | This work |

\*  $q_{6h}$



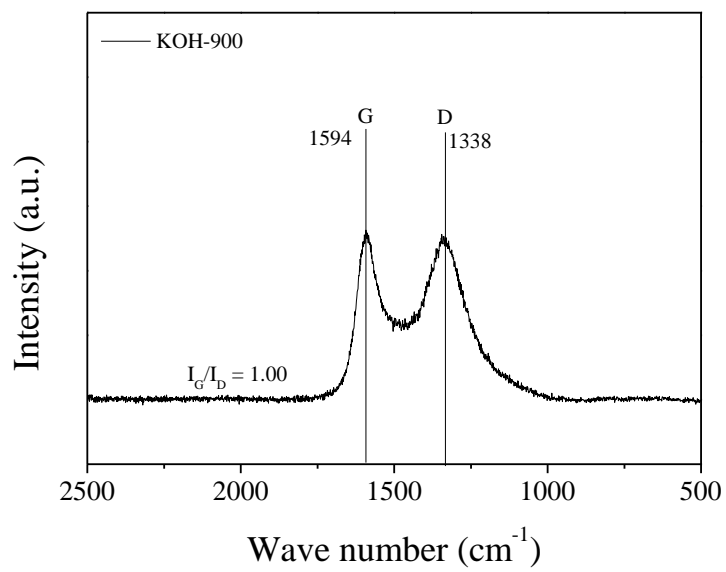

**Figure S1:** Raman spectrum of KOH-900.

## References

1. Song, J. Y.; Bhadra, B. N.; Jhung, S. H. *Micropor. Mesopor. Mater.* **2017**, *243*, 221–228.
2. Hasan, Z.; Choi, E. J.; Jhung, S. H. *Chem. Eng. J.* **2013**, *219*, 537–544.
3. Asuha, S.; Zhou, X. G.; Zhao, S. *J. Hazard. Mater.* **2010**, *181*, 204–210.
4. Jalil, A. A.; Triwahyono, S.; Adam, S. H.; Rahim N. D.; Aziz, M. A. A.; Hairom, N. H. H.; Razali N. A. M.; Abidin, M. A. Z.; Mohamadiah M. K. A. *J. Hazard. Mater.* **2010**, *181*, 755–762.
5. Chen, S.; Zhang, J.; Zhang, C.; Yue, Q.; Li, Y.; Li, C. *Desalination* **2010**, *252*, 149–156.
6. Gong, R.; Ye, J.; Dai, W.; Yan, X.; Hu, J.; Hu, X.; Li, S.; Huang, H. *Ind. Eng. Chem. Res.* **2013**, *52*, 14297–14303.
7. Haque, E.; Lee, J. E.; Jang, I. T.; Hwang, Y. K.; Chang, J.-S.; Jegal, J.; Jhung, S. H. *J. Hazard. Mater.* **2010**, *181*, 535–542.
8. Haque, E.; Jun, J. W.; Jhung, S. H. *J. Hazard. Mater.* **2011**, *185*, 507–511.
9. Kumar, K. V.; Sivanesan, S. *J. Hazard. Mater.* **2006**, *134*, 237–244.
10. Li, Y.; Du, Q.; Liu, T.; Peng, X.; Wang, J.; Sun, J.; Wang, Y.; Wu, S.; Wang, Z.; Xia, Y.; Xia, L. *Chem. Eng. Res. Des.* **2013**, *91*, 361–368.
11. Dong, Y.; Lu, B.; Zang, S.; Zhao, J.; Wang, X.; Cai, Q. *J. Chem. Technol. Biotechnol.* **2011**, *86*, 616–619.
12. Almeida, C. A. P.; Debacher, N. A.; Downs, A. J.; Cottet, L.; Mello, C. A. D. *J. Colloid Interface Sci.* **2009**, *332*, 46–53.
13. Yu, J.-X.; Li, B.-H.; Sun, X.-M.; Yuan, J.; Chi, R.-A. *J. Hazard. Mater.* **2009**, *168*, 1147–1154.
14. Hameed, B. H. *J. Hazard. Mater.* **2009**, *162*, 939–944.
15. Dai, J.; Sun, J.; Xie, A.; He, J.; Li, C.; Yan, Y. *RSC Adv.* **2016**, *6*, 3446–3457.
16. Haque, E.; Lo, V.; Minett, A. I.; Harris, T.; Church, T. L. *J. Mater. Chem. A* **2014**, *2*, 193–203.
